# Supplementary material
Source: PubMed Central journal article supplement (PMC2685652)
Supplement: M901104200_1.pdf [file M901104200_1.pdf]

## Supplemental Table 1:

### EMSA

#### *Probes*

HS2-236bp:

5' - ACCTGGAGACCTACGGCGCCGAGCTCACCGCTAACGTGCTGCGCGACATGGGCCTGCAGGAGATGGC  
CGGGCAGCTGCAGGCGGCCACGCACCAGGGTGAGCCGCCCCCGTTCCCCTCCACCCCGTCTTTCCCCTCC  
ACCCACACCAGCGCTTACCCCGCGGGCTCTTCCGCTTTCTGTTCCCTCCTACCCCTAAACAAAGCTGCTCT  
ACCGGAAAGGAGGCTCCCCACGCTTGGCC-3'

HS2-55bp:

5' - GCTCTTCCGCTTTCTGTTCCCTCCTACCCCTAAACAAAGCTGCTCTACCGGAAAGG-3'

#### *Competitors*

HS1:

5' - CCAGCTGGAGGGCGCGATCCTGGCGTCCCCGACGGCCTGGGGCCCCAAT-3'  
5' - ATTGGGGCCCCAGGCCGTGGGGGACGCCAGGATCGCGCCCTCCAGCTGG-3'

HS3/3A:

5' - ACCCTCATCCCCTGCATGTGGGGTCTGGTGGCCGCCCCCTGGAGCCCT-3'  
5' - AGGGCTCCAGGGGCGGCCACCAGGACCCACATGCAGTGGGATGAGGGT-3'

RCOIV:

5' - CGGGACCCGCTCTTCCGGTTCGCGAA-3'  
5' - TTCGCGACCGGAAGAGCGGGTCCCG-3'

CGBP:

5' - CTATGCTTCTTCTTCCGGTGAGGAAATGAAAAACAGCAG-3'  
5' - CTGCTGTTTTTCATTTCTCACCAGGAAGAAGAAGCATAG-3'

HS2-NS:

5' - GATGGCCGGGCAGCTGCAGGCGGCCACGCACCAGGGTGAGCCGCCCCCGTTC-3'  
5' - GAACGGGGCGGCTCACCCCTGGTGCCTGGCCGCTGCAGCTGCCCGGCCATC-3'

3C:

5' - AGAGGAATTCCTGAAGAACTCAAGTTCAGCAGGGACAGGCCCCACACCCT-3'  
5' - AGGGTGTGGGGCCTGTCCCTGCTGAACTTGAGTTCTTCAGGAATTCCTCT-3'

### DNAseI Footprinting

#### *Probe*

5' - TCCCCTCCACCCACACCAGCGCTTACCCCGCGGGCTCTTCCGCTTTCTGTTCC  
TCCTACCCCTAAACAAAGCTGCTCTACCGGAAAGGAGGCTCCCCACGCTTGGCC-3'

## **PCR Primers and Annealing Temperatures for Chromatin Immunoprecipitation**

TMS1-1: (55°C)

5' -GATGGAGTTTCGCTCTTGTTG-3'

5' -GGTGGGTGATCAGGAGTTTG-3'

TMS1-2: (55°C)

5' -AATTCTGGCTCCCCTAGGAA-3'

5' -AAAAGGGCAGAGAGTGCAA-3'

TMS1-3: (55°C)

5' -CCAGCTGGAGGGCGCGA-3'

5' -GCAAAAGGCGCTTCCTTACT-3'

TMS1-4: (60°C)

5' -CGCCTTGGACCTCACCGAC-3'

5' -ATGTCGCGCAGCACGTTAGC-3'

TMS1-5: (65.5°C)

5' -CCCATATCCTTCCAGGCTCTG-3'

5' -CAGGCTGTGCAGGAGTGCG-3'

TMS1-6: (60°C)

5' -AGAGCTCAGCTATGCTTCAG-3'

5' -CCTGGGTCACAGGCTGTTA-3'

TMS1-7: (55°C)

5' -GGTCATAGGTTGCACTTTGC-3'

5' -GTTTTAAATGTTCTTTCAAATGA-3'

## **PCR Primers for Mutagenesis**

**For deletion of GABP $\alpha$  binding site 1 (418-426bp):**

5' -CGAATGGGGCGCCCGAGGAAAGACAAGGAGG-3'

5' -CCTCCTTGTCTTTCCTCGGGCGCCCCATTTCG-3'

**For deletion of GABP $\alpha$  binding site 2 (458-466bp):**

5' -GGATTTGTTTCGACGAGCTTTCCTCCGAGGG-3'

5' -CCCTCGGAGGAAAGCTCGTCGAAACAAATCC-3'

## **siRNA sequences**

**GABP $\alpha$ -1:**

5' -UUUGCAGAGAAGCAGUAGCCAGAGC-3'

5' -GCUCUGGCUACUGCUUCUCUGCAA-3'

**GABP $\alpha$ -2:**

5' -AUCAAUCUCAAUUUCUAUCAGCUCC-3'

5' -GGAGCUGAUAGAAAUUGAGAUUGAU-3'

**GABP $\alpha$ -3:**

5' -CAAUGC UUUCUUCUGUGCACUCUGC-3'

5' -GCAGAGUGCACAGAAGAAAGCAUUG-3'

**GABP $\beta$ 1:**

5' -AAAUACGAACUUCAUCAUCUUGACC-3'

5' -GGUCAAGAUGAUGAAGUUCGUUUU-3'
